# Supplementary material for: Association of the Severity of Hypertensive Disorders in Pregnancy with Birthweight, Childhood Obesity, and Blood Pressure at Age 7
Source: MDPI journal article supplement (doi:10.3390/nu15143104), 2023-07-11
Supplement: s1 [file s1]

## **Supplemental methods**

### *1. Definition of hypertensive disorders in the CPP*

Mild hypertension: diastolic blood pressure  $\geq 90$  mmHg but  $< 110$  mmHg;

Severe hypertension: diastolic blood pressure  $\geq 110$  mmHg;

Mild proteinuria: urinary albumin 1+ or 2+;

Severe proteinuria: urinary albumin  $\geq 3+$ ;

Gestational hypertension: mild hypertension on two occasions or severe hypertension on one occasion from gestational age 24 weeks to 2 weeks postpartum;

Gestational proteinuria: mild proteinuria on two occasions or severe proteinuria on one occasion from gestational age 24 weeks to 2 weeks postpartum;

Mild gestational hypertension: mild hypertension alone;

Severe gestational hypertension: severe hypertension alone;

Mild preeclampsia: mild gestational hypertension + gestational proteinuria;

Severe preeclampsia and eclampsia: severe gestational hypertension plus any of the following symptoms: gestational proteinuria, oliguria, pulmonary edema, or convulsion from 24 weeks of gestation to 2 weeks postpartum;

### *2. Placental sample collection*

According to a standardized protocol by Dr Naeye [1], pathologists first conducted a gross examination of the freshly delivered placentas, followed by taking representative placental blocks from the central portion. In addition, one membrane roll sample, one umbilical cord sample, and samples from apparent gross

abnormalities were also obtained for microscopic examination. Pathologists conducting the placental examination were blinded to the clinical course for 98% of the gross and 97% of the microscopic examinations. Pathological lesions of the placenta were defined as dichotomous variables with one or more lesions based on the literature [2,3].

### *3. Definitions of covariates*

In the China Labor and Delivery Survey (CLADS), maternal pre-pregnancy body mass index (BMI) was defined as weight in kilograms divided by the square of height in meters ( $\text{kg/m}^2$ ) and was categorized as follows: underweight ( $<18.5 \text{ kg/m}^2$ ), normal ( $18.5\text{--}24.9 \text{ kg/m}^2$ ), and overweight or obesity ( $\geq 25 \text{ kg/m}^2$ ) according to the WHO BMI classification [4]. Maternal medical conditions included pre-existing/gestational diabetes and heart, renal, and thyroid diseases. The gestational age (GA) was ascertained based on the last menstrual period (LMP) or ultrasound dating in the first trimester when the date of the last menstrual period was uncertain. Maternal education levels were categorized as low (illiterate, primary school, and junior school), middle (high school, technical school, and junior college), and high (college or higher).

In the United States (US) Collaborative Perinatal Project (CPP), as GA was calculated only based on the LMP, pregnancies with implausible combinations of birth weight and GA were excluded [5]. Other covariables consisted of pre-pregnancy BMI [underweight ( $<18.5 \text{ kg/m}^2$ ), normal ( $18.5 - 24.9 \text{ kg/m}^2$ ), and overweight/obesity ( $\geq 25 \text{ kg/m}^2$ )], maternal age ( $<20$ ,  $20\text{--}24$ ,  $25\text{--}29$ ,  $30\text{--}35$ , and  $\geq 35$  years), race (White, Black,

and other), parity (0, 1, and  $\geq 2$ ), socioeconomic status [socioeconomic status (SES), 1-5 grades from the lowest to the highest) [6], maternal education (<10, 10–12, and >12 years), marital status (no or yes), smoking during pregnancy (no or yes), gestational weight gain (<10.0, 10.0–14.9, and  $\geq 15.0$ kg), and feeding methods (exclusively breast, exclusively bottle, and mixed feed).

## Reference

1. Naeye RL. Effects of maternal cigarette smoking on the fetus and placenta. *Br J Obstet Gynaecol.* 1978;85:732–7.
2. Ghidini A, Salafia CM, Pezzullo JC. Placental vascular lesions and likelihood of diagnosis of preeclampsia. *Obstet Gynecol* 1997;90(4 Pt 1):542–5.
3. Redline RW, Heller D, Keating S, Kingdom J. Placental diagnostic criteria and clinical correlation—a workshop report. *Placenta* 2005;26 Suppl A:S114–7.
4. WHO Expert Consultation. Appropriate body-mass index for Asian populations and its implications for policy and intervention strategies. *Lancet.* 2004;363:157–163.
5. Alexander GR, Himes JH, Kaufman RB, Mor J, Kogan M. A United States national reference for fetal growth. *Obstet Gynecol* 1996; 87: 163-168.
6. Myrianthopoulos NC, French KS. An application of the U.S. Bureau of the Census socioeconomic index to a large, diversified patient population. *Soc Sci Med.* 1968; 2: 283-299.

**Table S1.** Definition of placental pathological lesions, the Collaborative Perinatal Project.

| Placental lesions*                                           | Definition                                                                                                                                  |
|--------------------------------------------------------------|---------------------------------------------------------------------------------------------------------------------------------------------|
| <b>PBW ratio <math>\geq 90^{\text{th}}</math> percentile</b> | Placental weight and birth weight ratio higher than 90 <sup>th</sup> percentile for a given gestational week                                |
| <b>Placental maturity</b>                                    | Placental maturity above 37 gestational weeks                                                                                               |
| <b>Abruptio placenta</b>                                     | Placenta detach from its decidual site                                                                                                      |
| <b>Calcification</b>                                         | Calcification throughout cut surface                                                                                                        |
| <b>Vascular lesions</b>                                      |                                                                                                                                             |
| Old vascular infarct                                         | Yellow infarct in maternal surface, not marginal                                                                                            |
| Size of infarct                                              | At least one infarct $\geq 3$ cm in cut surface                                                                                             |
| Number of infarcts                                           | Number of infarcts $\geq 3$                                                                                                                 |
| Vessel thrombosis                                            | Vessel thrombosis in cord, membrane, chorionic plate and cut surface                                                                        |
| Vessel atheroma                                              | Vessel atheroma in decidua                                                                                                                  |
| <b>Villous lesions</b>                                       |                                                                                                                                             |
| Less syncytium-nuclear clumping                              | Syncytium-nuclear clumping less than normal for term placenta in decidua                                                                    |
| Much syncytium-nuclear clumping                              | Syncytium-Nuclear clumping much than normal for term placenta in decidua                                                                    |
| Villous infarct                                              | Micro infarcts in terminal villi or intervillous thrombi with adjacent villous infarct                                                      |
| Stromal fibrosis                                             | Many stromal fibrosis presented in terminal villi                                                                                           |
| Villous cytotrophoblast layer                                | Occurrence of villous cytotrophoblast layer                                                                                                 |
| <b>Membranous insertion of cord</b>                          | Membranous insertion                                                                                                                        |
| <b>Inflammatory cell infiltration</b>                        |                                                                                                                                             |
| Neutrophilic infiltration                                    | Neutrophilic infiltration in decidua, chorion or amnion of membrane roll, chorion of placental surface, umbilical vessels or cord substance |
| Lymphocytic infiltration                                     | Lymphocytic infiltration in capsularis, basalis or at margin                                                                                |

\* Each placental lesion was transformed into a dichotomous variable, coded as either “0” for negative or “1” for positive pathologic findings.

**Table S2.** Distribution of characteristics, the China Labor and Delivery Survey, 2015-2016

| Characteristics                                | Weighted number of<br>live births (%)<br>n = 7702096 | Weighted number of<br>macrosomia<br>(per 100 live births) | Weighted number of<br>LBW<br>(per 100 live births) | Weighted number of<br>LGA<br>(per 100 live births) | Weighted number of<br>SGA<br>(per 100 live births) |
|------------------------------------------------|------------------------------------------------------|-----------------------------------------------------------|----------------------------------------------------|----------------------------------------------------|----------------------------------------------------|
| <b>Maternal age</b>                            |                                                      |                                                           |                                                    |                                                    |                                                    |
| ≤ 19                                           | 176245 (2.3)                                         | 2333 (1.3)                                                | 9943 (5.6)                                         | 9462 (5.4)                                         | 25566 (14.5)                                       |
| 20-35                                          | 6933895 (90.0)                                       | 377546 (5.4)                                              | 93734 (1.4)                                        | 1212069 (17.5)                                     | 537187(7.7)                                        |
| ≥36                                            | 591957 (7.7)                                         | 64491 (10.9)                                              | 13998 (2.4)                                        | 164006 (27.7)                                      | 43574 (7.4)                                        |
| <b>Race</b>                                    |                                                      |                                                           |                                                    |                                                    |                                                    |
| Han                                            | 7446523 (96.7)                                       | 423054 (5.7)                                              | 109998 (1.5)                                       | 1341165 (18.0)                                     | 583413 (7.8)                                       |
| Other                                          | 255573 (3.3)                                         | 21316 (8.3)                                               | 7678 (3.0)                                         | 43372 (17.4)                                       | 22914 (9.0)                                        |
| <b>Mother's education level <sup>a</sup></b>   |                                                      |                                                           |                                                    |                                                    |                                                    |
| Low                                            | 2582929 (37.3)                                       | 156937 (6.1)                                              | 41147 (1.6)                                        | 436446 (16.9)                                      | 241287 (9.3)                                       |
| Middle                                         | 2724124 (39.3)                                       | 164480 (6.0)                                              | 46479 (1.7)                                        | 518103 (19.0)                                      | 196229 (7.2)                                       |
| High                                           | 1626923 (23.5)                                       | 85960 (5.3)                                               | 12696 (0.8)                                        | 297274 (18.3)                                      | 106991 (6.6)                                       |
| <b>Pre-pregnancy BMI</b>                       |                                                      |                                                           |                                                    |                                                    |                                                    |
| Underweight (<18.5 kg/m <sup>2</sup> )         | 721145 (13.7)                                        | 13283 (1.8)                                               | 18163 (2.5)                                        | 65689 (9.1)                                        | 100416 (13.9)                                      |
| Normal (18.5–24.9 kg/m <sup>2</sup> )          | 3793252 (72.3)                                       | 218852 (5.8)                                              | 43520 (1.1)                                        | 686403 (18.1)                                      | 249932 (6.6)                                       |
| Overweight or obesity (≥25 kg/m <sup>2</sup> ) | 732927 (14.0)                                        | 96021 (13.1)                                              | 10631 (1.5)                                        | 215249 (29.4)                                      | 26905 (3.7)                                        |
| <b>Parity</b>                                  |                                                      |                                                           |                                                    |                                                    |                                                    |
| 0                                              | 2564093 (33.4)                                       | 123518 (4.8)                                              | 39176 (1.5)                                        | 360831 (14.1)                                      | 254403 (9.9)                                       |
| ≥1                                             | 5117475 (66.6)                                       | 320285 (6.3)                                              | 78308 (1.5)                                        | 1021935 (20.0)                                     | 351381 (6.9)                                       |
| <b>Diabetes mellitus</b>                       |                                                      |                                                           |                                                    |                                                    |                                                    |
| No                                             | 7578855 (99.2)                                       | 428761 (5.7)                                              | 114711 (1.5)                                       | 1346147 (17.8)                                     | 591064 (7.8)                                       |
| Yes                                            | 63114 (0.8)                                          | 13607 (21.6)                                              | 1491 (2.4)                                         | 30407 (48.2)                                       | 3785 (6.0)                                         |
| <b>Heart disease</b>                           |                                                      |                                                           |                                                    |                                                    |                                                    |
| No                                             | 7661497 (99.7)                                       | 443281 (5.8)                                              | 116868 (1.5)                                       | 1376476 (18.0)                                     | 602950 (7.9)                                       |
| Yes                                            | 24672 (0.3)                                          | 735 (3.0)                                                 | 502 (2.0)                                          | 6509 (26.4)                                        | 1702 (6.9)                                         |
| <b>Renal disease</b>                           |                                                      |                                                           |                                                    |                                                    |                                                    |
| No                                             | 7680641 (99.9)                                       | 443114 (5.8)                                              | 117202 (1.5)                                       | 1378793 (18.0)                                     | 604644 (7.9)                                       |
| Yes                                            | 8988 (0.1)                                           | 216 (2.4)                                                 | 191 (2.1)                                          | 4759 (52.9)                                        | 494 (5.5)                                          |
| <b>Thyroid disease</b>                         |                                                      |                                                           |                                                    |                                                    |                                                    |
| No                                             | 7289449 (97.0)                                       | 419585 (5.8)                                              | 113054 (1.6)                                       | 1312619 (18.0)                                     | 571418 (7.8)                                       |

|                                            |                |              |              |                |              |
|--------------------------------------------|----------------|--------------|--------------|----------------|--------------|
| Yes                                        | 222479 (3.0)   | 9058 (4.1)   | 2775 (1.2)   | 36231 (16.3)   | 18787 (8.4)  |
| <b>Hypertensive disorders in pregnancy</b> |                |              |              |                |              |
| No                                         | 7476400 (97.1) | 423465 (5.7) | 98219 (1.3)  | 1336213 (17.9) | 578066 (7.7) |
| Gestational hypertension                   | 118574 (1.5)   | 13561 (11.4) | 3680 (3.1)   | 26488 (22.3)   | 8463 (7.1)   |
| mild preeclampsia                          | 41800 (0.5)    | 3464 (8.3)   | 761 (1.8)    | 14000 (33.5)   | 2206 (5.3)   |
| Severe preeclampsia/HELLP/ eclampsia       | 65322 (0.8)    | 3881 (5.9)   | 15016 (23.0) | 8837 (13.5)    | 17592 (26.9) |
| <b>Gestational diabetes</b>                |                |              |              |                |              |
| No                                         | 6661182 (89.6) | 357372 (5.4) | 105683 (1.6) | 1140825 (17.1) | 526617 (7.9) |
| Yes                                        | 773880 (10.4)  | 81792 (10.6) | 4243 (0.5)   | 222044 (28.7)  | 41935 (5.4)  |
| <b>Sex</b>                                 |                |              |              |                |              |
| Female                                     | 3605022 (46.8) | 153456 (4.3) | 60227 (1.7)  | 631383 (17.5)  | 325395 (9.0) |
| Male                                       | 4093900 (53.2) | 290314 (7.1) | 57416 (1.4)  | 754154 (18.4)  | 280933 (6.9) |

LBW: Low birth weight.

LGA: Large for gestational age.

SGA: Small for gestational age.

<sup>a</sup> Maternal education level: low (illiterate, primary school, and junior school), middle (high school, technical school, and junior college), and high (college or higher degree)

BMI, body mass index.

**Table S3.** Associations of hypertensive disorders in pregnancy with birth size: China, 2015-2016

| Hypertensive disorders in pregnancy | Macrosomia (>4000g)  |                                   | LBW (<2500g)            |                                   | LGA (>90th percentile) |                                   | SGA (<10th percentile) |                                   |
|-------------------------------------|----------------------|-----------------------------------|-------------------------|-----------------------------------|------------------------|-----------------------------------|------------------------|-----------------------------------|
|                                     | Crude OR (95% CI)    | Adjusted OR (95% CI) <sup>a</sup> | Crude OR (95% CI)       | Adjusted OR (95% CI) <sup>a</sup> | Crude OR (95% CI)      | Adjusted OR (95% CI) <sup>b</sup> | Crude OR (95% CI)      | Adjusted OR (95% CI) <sup>b</sup> |
| No                                  | Ref                  | Ref                               | Ref                     | Ref                               | Ref                    | Ref                               | Ref                    | Ref                               |
| Gestational hypertension            | 2.15<br>(2.11, 2.19) | 1.91<br>(1.87, 1.96)              | 2.41<br>(2.33, 2.49)    | 3.56<br>(3.39, 3.73)              | 1.32<br>(1.31, 1.34)   | 1.37<br>(1.34, 1.39)              | 0.92<br>(0.90, 0.94)   | 1.50<br>(1.45, 1.54)              |
| Mild preeclampsia                   | 1.51<br>(1.45, 1.56) | 0.98<br>(0.92, 1.05)              | 1.39<br>(1.30, 1.50)    | 1.29<br>(1.16, 1.43)              | 2.31<br>(2.27, 2.36)   | 0.89<br>(0.86, 0.92)              | 0.67<br>(0.64, 0.69)   | 1.46<br>(1.38, 1.55)              |
| Severe preeclampsia/HELLP/eclampsia | 0.98<br>(0.95, 1.02) | 0.57<br>(0.54, 0.60)              | 22.42<br>(21.99, 22.86) | 25.34<br>(24.59, 26.11)           | 0.72<br>(0.71, 0.74)   | 0.41<br>(0.40, 0.43)              | 4.44<br>(4.36, 4.51)   | 14.63<br>(14.29, 14.98)           |

LBW: Low birth weight.

LGA: Large for gestational age.

SGA: Small for gestational age.

<sup>a</sup>Adjusted for maternal age, race, education, sex, parity, pre-pregnancy body mass index (BMI), heart disease, renal disease, thyroid disease, diabetes mellitus, gestational diabetes, and gestational age.<sup>b</sup>Adjusted for maternal age, race, education, parity, pre-pregnancy body mass index (BMI), heart disease, renal disease, thyroid disease, diabetes mellitus, and gestational diabetes.

**Table S4.** Sensitivity analysis restricted to mothers without any pre-existing or gestational diabetes or heart, renal, or thyroid diseases, the China Labor and Delivery Survey, 2015-2016.

|                                     | Macrosomia           |                                  | LGA                  |                                  | LBW                     |                                  | SGA                  |                                  |
|-------------------------------------|----------------------|----------------------------------|----------------------|----------------------------------|-------------------------|----------------------------------|----------------------|----------------------------------|
| Hypertensive disorders in pregnancy | Crude OR (95% CI)    | Adjusted OR (95%CI) <sup>a</sup> | Crude OR (95% CI)    | Adjusted OR (95%CI) <sup>b</sup> | Crude OR (95% CI)       | Adjusted OR (95%CI) <sup>a</sup> | Crude OR (95% CI)    | Adjusted OR (95%CI) <sup>b</sup> |
| No                                  | Ref                  | Ref                              | Ref                  | Ref                              | Ref                     | Ref                              | Ref                  | Ref                              |
| Gestational hypertension            | 1.85<br>(1.81, 1.89) | 1.64<br>(1.60, 1.69)             | 1.11<br>(1.09, 1.13) | 1.26<br>(1.23, 1.29)             | 1.77<br>(1.69, 1.84)    | 1.80<br>(1.67, 1.93)             | 0.84<br>(0.82, 0.86) | 1.03<br>(1.01, 1.05)             |
| Mild preeclampsia                   | 1.56<br>(1.50, 1.62) | 1.02<br>(0.97, 1.08)             | 2.47<br>(2.42, 2.53) | 0.92<br>(0.88, 0.95)             | 1.40<br>(1.30, 1.52)    | 1.07<br>(1.01, 1.15)             | 0.76<br>(0.73, 0.80) | 1.56<br>(1.47, 1.65)             |
| Severe preeclampsia/HELLP/eclampsia | 0.88<br>(0.84, 0.91) | 0.93<br>(0.90, 0.97)             | 0.71<br>(0.69, 0.72) | 0.71<br>(0.69, 0.74)             | 26.20<br>(25.67, 26.74) | 27.35<br>(26.50, 28.23)          | 5.09<br>(4.99, 5.19) | 15.80<br>(15.41, 16.19)          |

LBW: Low birth weight.

LGA: Large for gestational age.

SGA: Small for gestational age.

<sup>a</sup>Adjusted for maternal age, race, education, parity, pre-pregnancy BMI, sex, and gestational age

<sup>b</sup>Adjusted for maternal age, race, education, parity, and pre-pregnancy BMI.



**Table S5.** Baseline characteristics by macrosomia, the collaborative perinatal project.

|                                            | Without macrosomia<br>N (%) | With macrosomia<br>N (%) | $\chi^2$ | p      |
|--------------------------------------------|-----------------------------|--------------------------|----------|--------|
| N (%)                                      | 33453 (94.5)                | 1940 (5.5)               |          |        |
| <b>Maternal age (years)</b>                |                             |                          | 230.3    | <.0001 |
| < 20                                       | 7924 (23.7)                 | 257 (13.3)               |          |        |
| 20–24                                      | 12719 (38.0)                | 671 (34.5)               |          |        |
| 25–29                                      | 7246 (21.7)                 | 476 (24.6)               |          |        |
| 30–34                                      | 3981 (11.9)                 | 366 (18.9)               |          |        |
| ≥ 35                                       | 1583 (4.7)                  | 169 (8.7)                |          |        |
| Mean (SD)                                  | 23.9 (5.7)                  | 26.0 (6.1)               | -16.0    | <.0001 |
| <b>Race</b>                                |                             |                          | 315.6    | <.0001 |
| White                                      | 16939 (50.6)                | 1383 (71.3)              |          |        |
| Black                                      | 13970 (41.8)                | 454 (23.4)               |          |        |
| other                                      | 2544 (7.6)                  | 103 (5.3)                |          |        |
| <b>Parity</b>                              |                             |                          | 226.8    | <.0001 |
| 0                                          | 10797 (32.3)                | 371 (19.1)               |          |        |
| 1                                          | 8011 (24.0)                 | 394 (20.3)               |          |        |
| ≥ 2                                        | 14621 (43.7)                | 1174 (60.6)              |          |        |
| <b>SES</b>                                 |                             |                          | 58.8     | <.0001 |
| 1 (Lowest)                                 | 2283 (7.0)                  | 90 (4.8)                 |          |        |
| 2                                          | 9611 (29.6)                 | 472 (25.1)               |          |        |
| 3                                          | 9992 (30.8)                 | 564 (30.0)               |          |        |
| 4                                          | 6837 (21.1)                 | 471 (25.0)               |          |        |
| 5 (Highest)                                | 3729 (11.5)                 | 284 (15.1)               |          |        |
| <b>Maternal education levels (year)</b>    |                             |                          | 14.0     | <.0001 |
| Less than high school (≤9)                 | 9508 (28.5)                 | 502 (26.0)               |          |        |
| High school (10–12)                        | 19389 (58.1)                | 1120 (57.9)              |          |        |
| College and above (>12)                    | 4464 (13.4)                 | 311 (16.1)               |          |        |
| <b>Married</b>                             | 25788 (77.1)                | 1639 (84.5)              | 57.5     | <.0001 |
| <b>Smoking during pregnancy</b>            | 15708 (47.3)                | 654 (34.1)               | 127.4    | <.0001 |
| <b>Pre-pregnant BMI (kg/m2)</b>            |                             |                          | 247.7    | <.0001 |
| <18.5                                      | 5015 (15.3)                 | 189 (9.9)                |          |        |
| 18.5–24.9                                  | 21848 (66.4)                | 1113 (57.9)              |          |        |
| >25.0                                      | 6023 (18.3)                 | 617 (32.2)               |          |        |
| Mean (SD)                                  | 22.1 (6.9)                  | 23.9 (7.9)               | -11.3    | <.0001 |
| <b>Gestational weight gain (kg)</b>        |                             |                          | 93.7     | <.0001 |
| < 10.0                                     | 1799 (5.4)                  | 57 (3.0)                 |          |        |
| 10.0 – 14.9                                | 4467 (13.4)                 | 138 (7.1)                |          |        |
| ≥ 15.0                                     | 26977 (81.2)                | 1739 (89.9)              |          |        |
| Mean (SD)                                  | 11.9 (8.0)                  | 13.9 (7.7)               | 10.8     | <.0001 |
| <b>Pre-existed or gestational diabetes</b> | 518 (1.6)                   | 86 (4.5)                 | 91.0     | <.0001 |
| <b>Sex</b>                                 |                             |                          | 145.4    | <.0001 |
| Male                                       | 16651 (49.8)                | 1239 (63.9)              |          |        |
| Female                                     | 16794 (50.2)                | 701 (36.1)               |          |        |

BMI: body mass index

SES: socioeconomic status

**Table S6.** Baseline characteristics by large for gestational age, the collaborative perinatal project.

|                                            | Without LGA<br>N (%) | With LGA<br>N (%) | $\chi^2$ | p     |
|--------------------------------------------|----------------------|-------------------|----------|-------|
| N (%)                                      | 30498 (86.2)         | 4887 (13.8)       |          |       |
| <b>Maternal age (years)</b>                |                      |                   | 329.8    | <0001 |
| < 20                                       | 7403 (24.3)          | 777 (15.9)        |          |       |
| 20–24                                      | 11670 (38.3)         | 1717 (35.1)       |          |       |
| 25–29                                      | 6524 (21.4)          | 1196 (24.5)       |          |       |
| 30–34                                      | 3497 (11.5)          | 849 (17.4)        |          |       |
| ≥ 35                                       | 1404 (4.6)           | 347 (7.1)         |          |       |
| Mean (SD)                                  | 23.8 (5.7)           | 25.4 (6.0)        | -18.6    | <0001 |
| <b>Race</b>                                |                      |                   | 182.9    | <0001 |
| White                                      | 15355 (50.4)         | 2960 (60.6)       |          |       |
| Black                                      | 12837 (42.1)         | 1586 (32.5)       |          |       |
| other                                      | 2306 (7.6)           | 341 (6.9)         |          |       |
| <b>Parity</b>                              |                      |                   | 317.3    | <0001 |
| 0                                          | 10115 (33.2)         | 1051 (21.5)       |          |       |
| 1                                          | 7255 (23.8)          | 1147 (23.5)       |          |       |
| ≥ 2                                        | 13106 (43)           | 2686 (55.0)       |          |       |
| <b>SES</b>                                 |                      |                   | 58.4     | <0001 |
| 1 (Lowest)                                 | 2102 (7.1)           | 269 (5.7)         |          |       |
| 2                                          | 8832 (29.9)          | 1250 (26.4)       |          |       |
| 3                                          | 9096 (30.7)          | 1460 (30.8)       |          |       |
| 4                                          | 6173 (20.9)          | 1134 (23.9)       |          |       |
| 5 (Highest)                                | 3384 (11.4)          | 628 (13.3)        |          |       |
| <b>Maternal education levels (year)</b>    |                      |                   | 11.7     | <0001 |
| Less than high school (≤9)                 | 8694 (28.6)          | 1312 (27.0)       |          |       |
| High school (10–12)                        | 17676 (58.1)         | 2830 (58.2)       |          |       |
| College and above (>12)                    | 4049 (13.3)          | 725 (14.9)        |          |       |
| <b>Married</b>                             | 23395 (76.7)         | 4026 (82.4)       | 77.6     | <0001 |
| <b>Smoking during pregnancy</b>            | 14660 (48.5)         | 1700 (35.1)       | 299.3    | <0001 |
| <b>Pre-pregnant BMI (kg/m2)</b>            |                      |                   | 299.1    | <0001 |
| <18.5                                      | 4665 (15.6)          | 538 (11.2)        |          |       |
| 18.5–24.9                                  | 20021 (66.8)         | 2935 (61.0)       |          |       |
| >25.0                                      | 5299 (17.7)          | 1340 (27.8)       |          |       |
| Mean (SD)                                  | 22.0 (6.8)           | 23.4 (7.9)        | -13.6    | <0001 |
| <b>Gestational weight gain (kg)</b>        |                      |                   | 350.4    | <0001 |
| < 10.0                                     | 14747 (48.7)         | 1736 (35.7)       |          |       |
| 10.0 – 14.9                                | 10896 (36.0)         | 1980 (40.7)       |          |       |
| ≥ 15.0                                     | 4660 (15.4)          | 1151 (23.7)       |          |       |
| Mean (SD)                                  | 11.8 (7.9)           | 13.2 (8.0)        | -12.0    | <0001 |
| <b>Pre-existed or gestational diabetes</b> | 424 (1.4)            | 180 (3.7)         | 132.3    | <0001 |
| <b>Sex</b>                                 |                      |                   | 0.8      | 0.400 |
| Male                                       | 15391 (50.5)         | 2499 (51.1)       |          |       |
| Female                                     | 15107 (49.5)         | 2388 (48.9)       |          |       |

LGA: Large for gestational age.

BMI: body mass index.

SES: socioeconomic status.

**Table S7.** Risk ratio between adverse outcomes at 7 years of age and pregnant hypertensive disorders, the Collaborative Perinatal Project.

|                                      |                     | Without adverse<br>outcome | With adverse<br>outcome | Crude OR                 | Adjusted OR <sup>a</sup>             | Adjusted OR <sup>b</sup> |
|--------------------------------------|---------------------|----------------------------|-------------------------|--------------------------|--------------------------------------|--------------------------|
|                                      |                     | N (%)                      | N (%)                   | (95% CI)                 | (95% CI)                             | (95% CI)                 |
| Macrosomia (>4000g)                  | Normal BP           | 28699 (85.7)               | 1610 (83.0)             | Ref                      | Ref                                  | /                        |
|                                      | Mild GH + severe GH | 3352 (10.1)                | 236 (12.1)              | <b>1.26 (1.09, 1.45)</b> | <b>1.31 (1.12, 1.52)</b>             |                          |
|                                      | Mild GH             | 2968 (8.9)                 | 212 (10.9)              | <b>1.27 (1.10, 1.48)</b> | <b>1.32 (1.13, 1.55)</b>             |                          |
|                                      | Severe GH           | 384 (1.2)                  | 24 (1.2)                | 1.11 (0.74, 1.69)        | 1.11 (0.69, 1.78)                    |                          |
|                                      | Mild PE             | 1047 (3.1)                 | 73 (3.8)                | 1.24 (0.98, 1.58)        | 1.20 (0.91, 1.57)                    |                          |
|                                      | Severe PE           | 355 (1.1)                  | 21 (1.1)                | 1.05 (0.68, 1.64)        | 1.57 (0.97, 2.52)                    |                          |
| LBW (<2500g)                         | Normal BP           | 28827 (85.8)               | 1482 (81.0)             | Ref                      | Ref                                  | /                        |
|                                      | Mild GH + severe GH | 3381 (10.1)                | 207 (11.3)              | <b>1.19 (1.03, 1.38)</b> | <b>1.23 (1.04, 1.44)</b>             |                          |
|                                      | Mild GH             | 3009 (9.0)                 | 171 (9.3)               | 1.11 (0.94, 1.30)        | 1.16 (0.98, 1.38)                    |                          |
|                                      | Severe GH           | 372 (1.1)                  | 36 (2.0)                | <b>1.88 (1.33, 2.66)</b> | <b>1.71 (1.17, 2.49)</b>             |                          |
|                                      | Mild PE             | 1035 (3.1)                 | 85 (4.7)                | <b>1.60 (1.27, 2.01)</b> | <b>1.77 (1.39, 2.25)</b>             |                          |
|                                      | Severe PE           | 322 (1.0)                  | 54 (3.0)                | <b>3.26 (2.43, 4.37)</b> | <b>2.77 (2.02, 3.81)</b>             |                          |
| LGA (>90 <sup>th</sup> percentile)   | Normal BP           | 26161 (85.8)               | 4140 (84.8)             | Ref                      | Ref                                  |                          |
|                                      | Mild GH + severe GH | 3053 (10.0)                | 535 (10.9)              | <b>1.11 (1.01, 1.22)</b> | <b>1.29 (1.16, 1.43)<sup>^</sup></b> |                          |
|                                      | Mild GH             | 2700 (8.9)                 | 480 (9.8)               | <b>1.13 (1.02, 1.25)</b> | <b>1.25 (1.12, 1.39)<sup>^</sup></b> |                          |
|                                      | Severe GH           | 353 (1.1)                  | 55 (1.1)                | 0.99 (0.74, 1.31)        | 1.08 (0.80, 1.47) <sup>^</sup>       |                          |
|                                      | Mild PE             | 957 (3.1)                  | 163 (3.3)               | 1.08 (0.91, 1.28)        | 1.13 (0.94, 1.36) <sup>^</sup>       |                          |
|                                      | Severe PE           | 327 (1.1)                  | 49 (1.0)                | 0.95 (0.70, 1.28)        | 1.16 (0.85, 1.60) <sup>^</sup>       |                          |
| SGA (<10 <sup>th</sup> percentile)   | Normal BP           | 26773 (86.1)               | 3528 (82.6)             | Ref                      | Ref                                  |                          |
|                                      | Mild GH + severe GH | 3111 (10.0)                | 477 (11.2)              | <b>1.16 (1.05, 1.29)</b> | 1.05 (0.94, 1.18) <sup>^</sup>       |                          |
|                                      | Mild GH             | 2778 (8.9)                 | 402 (9.4)               | 1.10 (0.98, 1.22)        | 1.03 (0.91, 1.16) <sup>^</sup>       |                          |
|                                      | Severe GH           | 333 (1.1)                  | 75 (1.8)                | <b>1.71 (1.33, 2.20)</b> | <b>1.50 (1.15, 1.95)<sup>^</sup></b> |                          |
|                                      | Mild PE             | 945 (3.0)                  | 175 (4.1)               | <b>1.41 (1.19, 1.66)</b> | <b>1.27 (1.07, 1.52)<sup>^</sup></b> |                          |
|                                      | Severe PE           | 287 (0.9)                  | 89 (2.1)                | <b>2.35 (1.85, 2.99)</b> | <b>2.00 (1.55, 2.58)<sup>^</sup></b> |                          |
| Overweight/obesity at 7 years<br>old | Normal BP           | 18913 (86.0)               | 4260 (83.5)             | Ref                      | Ref                                  | Ref                      |

|                                                               |           |              |             |                          |                          |                           |
|---------------------------------------------------------------|-----------|--------------|-------------|--------------------------|--------------------------|---------------------------|
| (>85 <sup>th</sup> percentile)                                | Mild GH   | 1866 (8.5)   | 528 (10.3)  | <b>1.26 (1.13, 1.39)</b> | <b>1.23 (1.11, 1.37)</b> | <b>1.19 (1.07, 1.33)*</b> |
|                                                               | Severe GH | 266 (1.2)    | 63 (1.2)    | 1.05 (0.80, 1.39)        | 1.03 (0.77, 1.38)        | 1.03 (0.77, 1.39)*        |
|                                                               | Mild PE   | 700 (3.2)    | 190 (3.7)   | <b>1.21 (1.02, 1.42)</b> | 1.16 (0.97, 1.38)        | 1.15 (0.96, 1.36)*        |
|                                                               | Severe PE | 251 (1.1)    | 65 (1.3)    | 1.15 (0.87, 1.51)        | 1.10 (0.82, 1.48)        | 1.13 (0.84, 1.53)*        |
| Elevated SBP at 7 years old<br>(>90 <sup>th</sup> percentile) | Normal BP | 20768 (85.9) | 2357 (82.4) | Ref                      | Ref                      | Ref                       |
|                                                               | Mild GH   | 2098 (8.7)   | 286 (10.0)  | <b>1.20 (1.05, 1.37)</b> | <b>1.22 (1.06, 1.39)</b> | <b>1.18 (1.02, 1.36)</b>  |
|                                                               | Severe GH | 286 (1.2)    | 43 (1.5)    | 1.33 (0.99, 1.83)        | 1.35 (1.00, 1.89)        | <b>1.39 (1.01, 1.96)</b>  |
|                                                               | Mild PE   | 759 (3.1)    | 132 (4.6)   | <b>1.53 (1.27, 1.85)</b> | <b>1.59 (1.31, 1.94)</b> | <b>1.58 (1.29, 1.94)</b>  |
|                                                               | Severe PE | 273 (1.1)    | 43 (1.5)    | <b>1.39 (1.03, 1.92)</b> | 1.31 (0.92, 1.85)        | 1.32 (0.92, 1.88)         |
| Elevated DBP at 7 years old<br>(>90 <sup>th</sup> percentile) | Normal BP | 20727 (85.7) | 2278 (83.2) | Ref                      | Ref                      | Ref                       |
|                                                               | Mild GH   | 2085 (8.6)   | 293 (10.7)  | <b>1.28 (1.12, 1.46)</b> | <b>1.33 (1.17, 1.53)</b> | <b>1.29 (1.13, 1.48)</b>  |
|                                                               | Severe GH | 286 (1.2)    | 37 (1.4)    | 1.18 (0.83, 1.66)        | 1.33 (0.94, 1.88)        | 1.30 (0.91, 1.85)         |
|                                                               | Mild PE   | 788 (3.3)    | 98 (3.6)    | 1.13 (0.91, 1.40)        | 1.17 (0.93, 1.46)        | 1.15 (0.92, 1.44)         |
|                                                               | Severe PE | 284 (1.2)    | 30 (1.1)    | 0.96 (0.66, 1.40)        | 0.94 (0.62, 1.41)        | 0.80 (0.59, 1.35)         |

LBW: Low birth weight.

SGA: Small for gestational age.

LGA: Large for gestational age.

Elevated SBP: Systolic blood pressure at 7 years of age higher than 125 mmHg, the 90<sup>th</sup> percentile within the CPP population.

Elevated DBP: Diastolic blood pressure at 7 years of age higher than 70 mmHg, the 90<sup>th</sup> percentile within the CPP population.

Overweight/obesity: Race- and sex-specific body mass index at 7 years of age higher than the 85<sup>th</sup> percentile within the CPP population.

GH: Gestational hypertension.

Mild PE: mild preeclampsia.

Severe PE: Severe preeclampsia/ eclampsia.

Model a: Adjusted for maternal age, parity, race, sex, maternal education level, marital status, smoking status during pregnancy, socioeconomic status, diabetes, maternal pre-pregnancy body mass index (BMI), gestational weight gain, and gestational age.

Model b: Model a + birthweight and body mass index at 7 years of age.

Model ^: maternal age, parity, race, maternal education level, marital status, smoking status during pregnancy, socioeconomic status, diabetes, maternal pre-pregnancy body mass index (BMI), and gestational weight gain.

\* Model a + birthweight.
